# Supplementary material for: Synthesis of an iso-type graphitic carbon nitride heterojunction derived from oxamide and urea in molten salt for high-performance visible-light driven photocatalysis
Source: Royal Society of Chemistry journal article supplement (doi:10.1039/d2nj00741j), 2022-01-01
Supplement: d2nj00741j1.pdf [file d2nj00741j1.pdf]

## Electronic Supplementary Information

Synthesis of iso-type graphitic carbon nitride heterojunction derived from oxamide and urea in molten salt for high-performance visible-light driven photocatalysis

Md. Ashraful Islam Molla,<sup>a,b</sup> Hideyuki Katsumata,<sup>a,\*</sup> Mai Furukawa,<sup>a</sup> Ikki Tateishi,<sup>c</sup> and Satoshi Kaneco<sup>a</sup>

<sup>a</sup> *Department of Chemistry for Materials, Graduate School of Engineering, Mie University, Tsu, Mie 514-8507, Japan*

<sup>b</sup> *Department of Applied Chemistry & Chemical Engineering, University of Dhaka, Dhaka-1000, Bangladesh*

<sup>c</sup> *Mie Global Environment Center for Education & Research, Mie University, Tsu, Mie 514-8507, Japan*

\*Corresponding Author.

E-mail: [hidek@chem.mie-u.ac.jp](mailto:hidek@chem.mie-u.ac.jp) (H. Katsumata). Tel/Fax: +81-59231-9425.

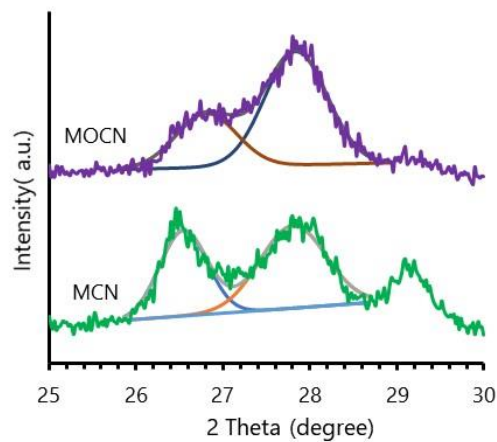

Figure S1. Enlarged XRD patterns of MCN and MOCN.

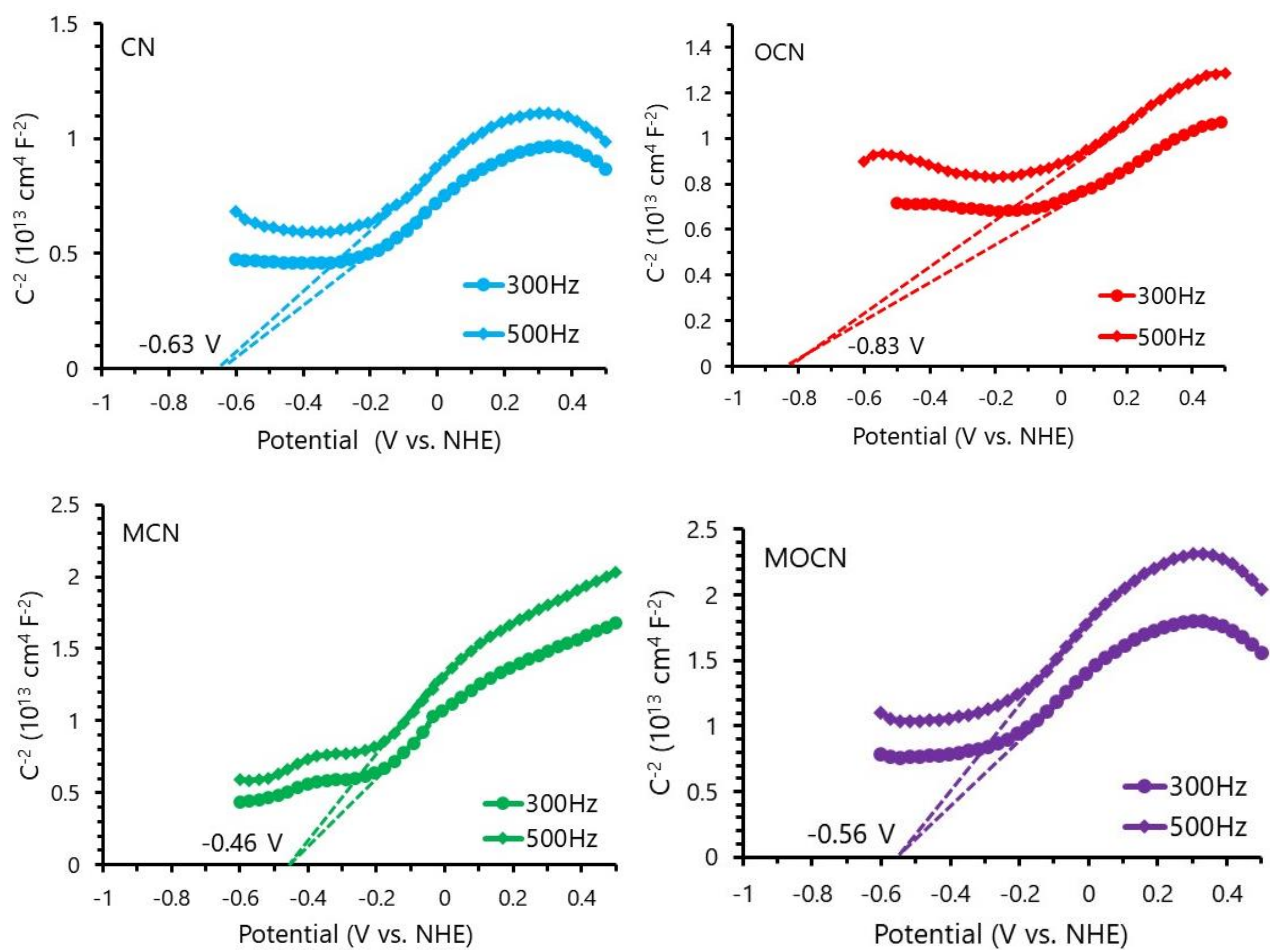

Figure S2. Mott-Schottky plots at different frequencies of CN, OCN, MCN and MOCN photocatalysts.

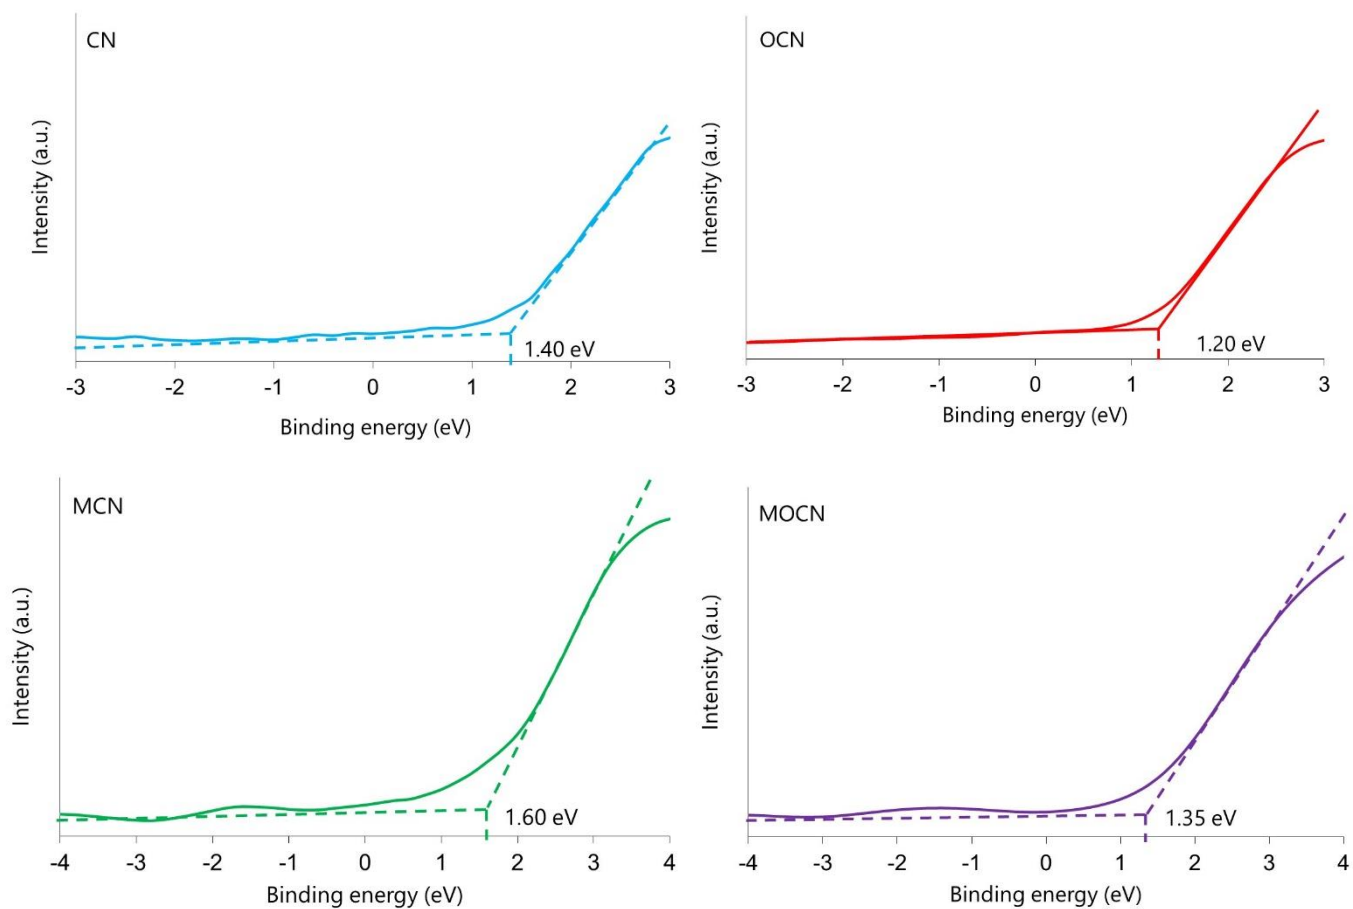

Figure S3. VB-XPS spectra of CN, OCN, MCN and MOCN photocatalysts.

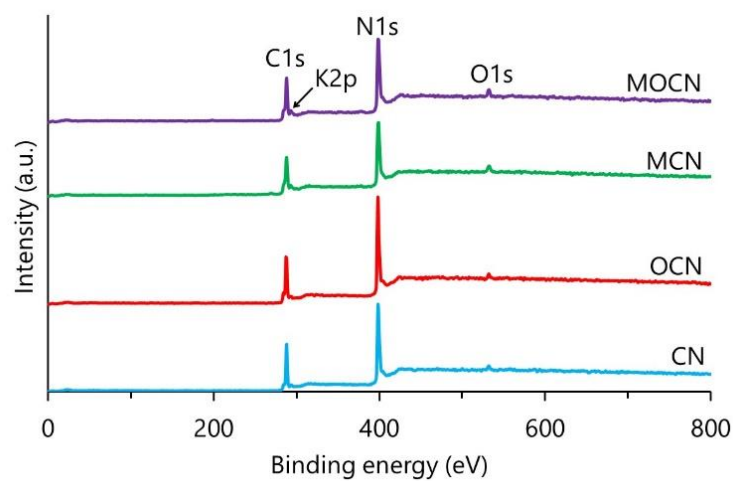

Figure S4. Survey XPS spectra of CN, OCN, MCN and MOCN photocatalysts.

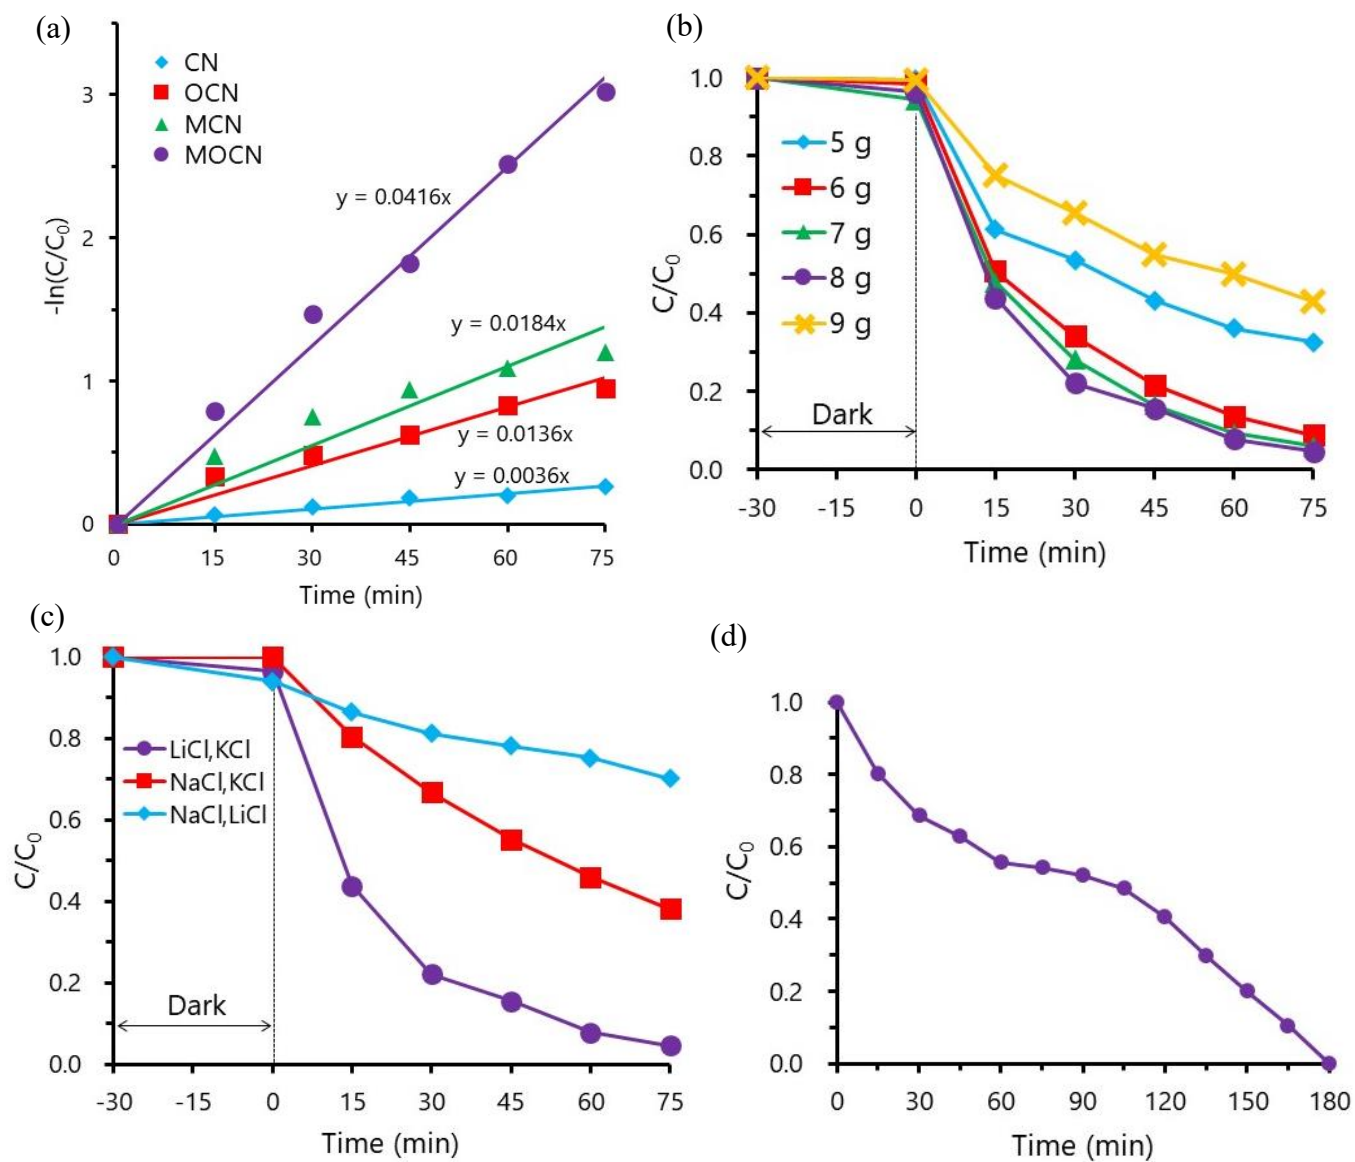

Figure S5. (a)  $-\ln(C/C_0)$  plots, (b) effect of molten salt amounts on the degradation of BPA, (c) effect of kinds of molten salts on the degradation of BPA, and (d) decrease of TOC with MOCN photocatalyst.

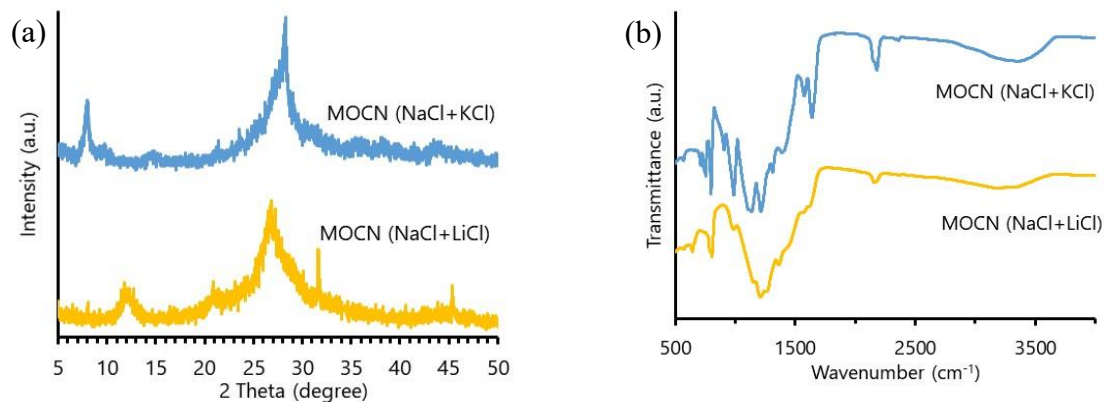

Figure S6. (a) XRD patterns and (b) FT/IR spectra of MOCN (NaCl+KCl) and MOCN (NaCl+LiCl).

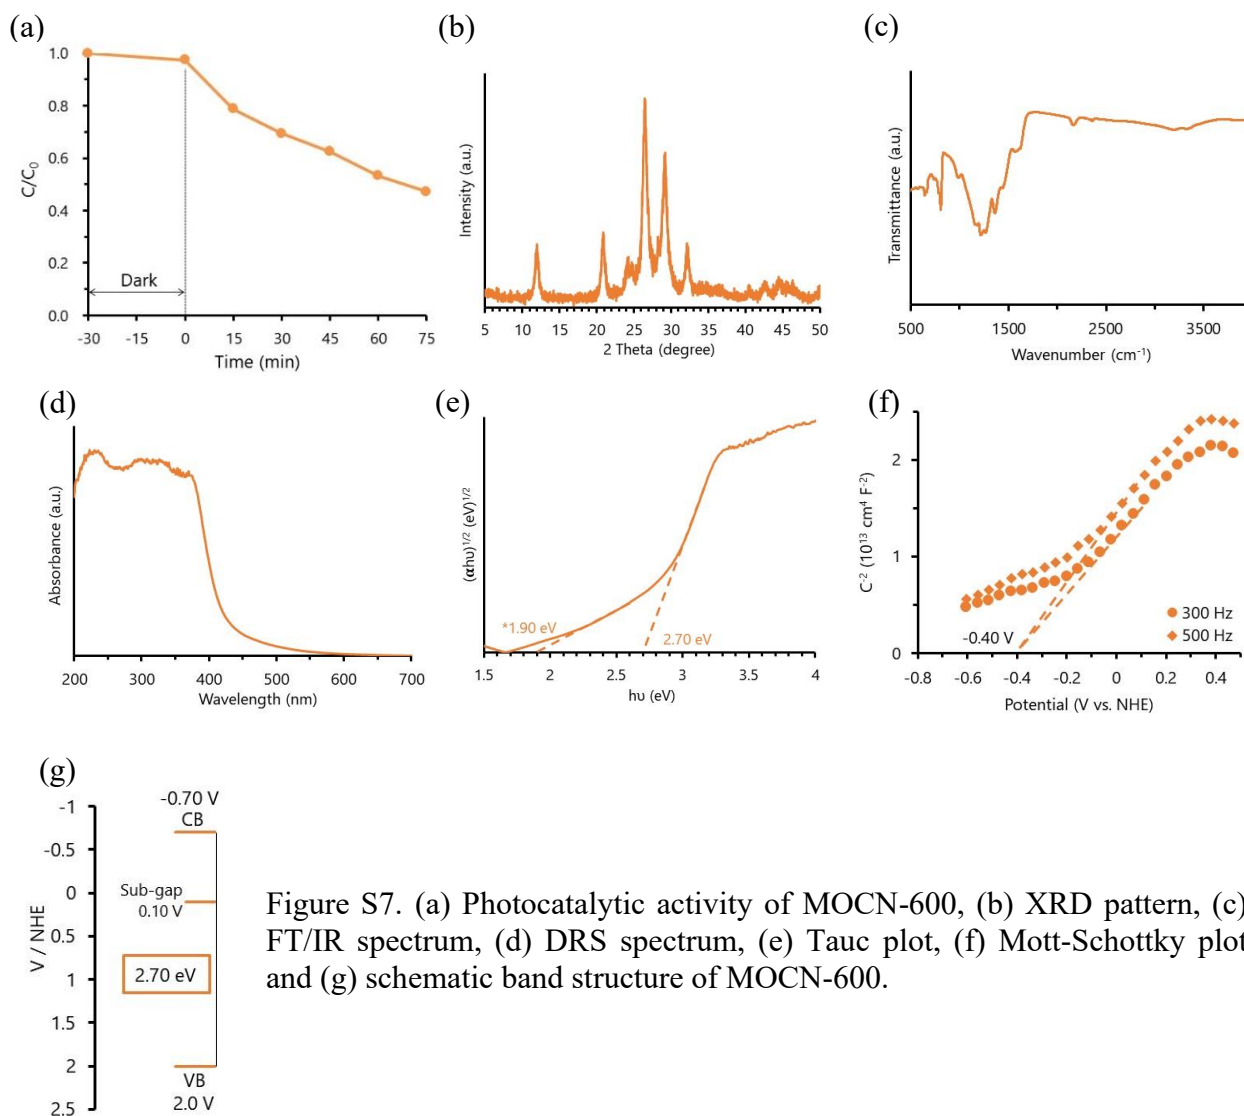

Figure S7. (a) Photocatalytic activity of MOCN-600, (b) XRD pattern, (c) FT/IR spectrum, (d) DRS spectrum, (e) Tauc plot, (f) Mott-Schottky plot and (g) schematic band structure of MOCN-600.

Table S1. Fitted parameters obtained from TRPL spectra of CN, OCN, MCN and MOCN

| Photocatalyst | $\langle\tau\rangle$ (ns) | $\tau_1$ (ns)<br>(Rel. %) | $\tau_2$ (ns)<br>(Rel. %) | $\tau_3$ (ns)<br>(Rel. %) |
|---------------|---------------------------|---------------------------|---------------------------|---------------------------|
| CN            | 4.70                      | 0.36<br>(58.60)           | 2.17<br>(34.64)           | 9.22<br>(6.76)            |
| OCN           | 1.89                      | 0.28<br>(67.02)           | 1.21<br>(27.33)           | 4.13<br>(5.65)            |
| MCN           | 3.51                      | 0.32<br>(59.70)           | 1.74<br>(33.10)           | 6.85<br>(7.11)            |
| MOCN          | 1.55                      | 0.24<br>(72.02)           | 1.03<br>(22.60)           | 3.43<br>(5.38)            |

Table S2. Photocatalytic degradation kinetic parameters of BPA

| Photocatalyst | Rate constant, $k$<br>( $\text{min}^{-1}$ ) | Correlation<br>coefficient ( $R^2$ ) | Half-life, $t_{1/2}$<br>(min) |
|---------------|---------------------------------------------|--------------------------------------|-------------------------------|
| CN            | 0.0036                                      | 0.973                                | 192.5                         |
| OCN           | 0.0136                                      | 0.954                                | 51.0                          |
| MCN           | 0.0184                                      | 0.875                                | 37.7                          |
| MOCN          | 0.0416                                      | 0.986                                | 16.7                          |
